# Supplementary material for: The interactive role of income (material position) and income rank (psychosocial position) in psychological distress: a 9-year longitudinal study of 30,000 UK parents
Source: Springer Nature journal article supplement (doi:10.1007/s00127-016-1255-y), 2016-07-04
Supplement: MOESM4 [file 10332924]

Supplementary material for manuscript “*The Interactive Role of Income (material position) and Income Rank (psychosocial position) in Psychological Distress: A 9-year Longitudinal Study of 30,000 UK Parents*”. Social Psychiatry and Psychiatric Epidemiology. Elisabeth A. Garratt[[1]](#footnote-1), Tarani Chandola, Kingsley Purdam, Alex M. Wood

Online Resource 4

This supplementary shows the interaction terms included in Model 6 using log-transformed and untransformed Kessler scores to explore the possibility that log-transforming the Kessler scores can result in plots that diverge and might produce spurious interactions.

Figure 1 Slope of the marginal effects of interactions between absolute income and income rank on parents’ (a) Log-transformed (b) Untransformed Kessler scores

1. Corresponding author. Nuffield College, New Road, Oxford, England OX1 1NF. Tel +4418 6527 8517. Fax: +44 1865 278621. Email e[lisabeth.garratt@nuffield.ox.ac.uk](mailto:lisabeth.garratt@nuffield.ox.ac.uk) [↑](#footnote-ref-1)
